# Supplementary material for: Exposure to Blue Light Reduces Melanopsin Expression in Intrinsically Photoreceptive Retinal Ganglion Cells and Damages the Inner Retina in Rats
Source: PubMed Central journal article supplement (PMC8787613; doi:10.1167/iovs.63.1.26), 2022-01-21
Supplement: iovs-63-1-26_s001.pdf [file iovs-63-1-26_s001.pdf]

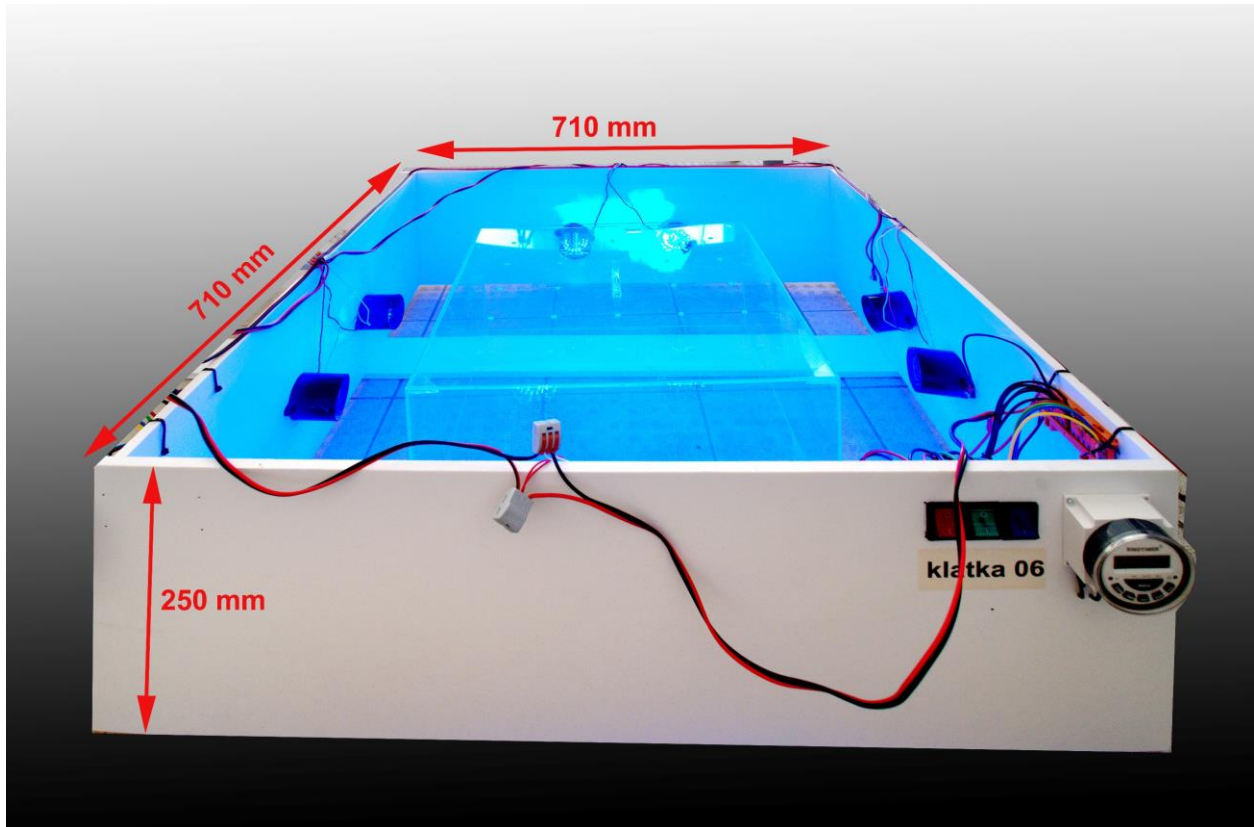

**Supplementary Figure 1.** Enclosure for experimental light exposure.
