# Supplementary material for: Exposure to Blue Light Reduces Melanopsin Expression in Intrinsically Photoreceptive Retinal Ganglion Cells and Damages the Inner Retina in Rats
Source: PubMed Central journal article supplement (PMC8787613; doi:10.1167/iovs.63.1.26), 2022-01-21
Supplement: iovs-63-1-26_s002.pdf [file iovs-63-1-26_s002.pdf]

| Animal number | Whole mount immunocytochemistry <sup>a</sup> |      |           |      |         |      | TUNEL <sup>b</sup> |      |           |      |         |      | Transmission electron microscopy <sup>c</sup> |      |           |      |         |      |  |
|---------------|----------------------------------------------|------|-----------|------|---------|------|--------------------|------|-----------|------|---------|------|-----------------------------------------------|------|-----------|------|---------|------|--|
|               | Acute                                        |      | Long term |      | Control |      | Acute              |      | Long term |      | Control |      | Acute                                         |      | Long term |      | Control |      |  |
|               | Right                                        | Left | Right     | Left | Right   | Left | Right              | Left | Right     | Left | Right   | Left | Right                                         | Left | Right     | Left | Right   | Left |  |
| Rat 1 ♀       | +                                            |      | +         |      | +       |      | +                  |      | +         |      | +       |      | +                                             |      | +         |      | +       |      |  |
| Rat 2 ♂       |                                              | +    |           | +    |         | +    |                    | +    |           | +    |         | +    |                                               | +    |           | +    |         | +    |  |
| Rat 3 ♀       | +                                            |      | +         |      | +       |      | +                  |      | +         |      | +       |      | +                                             |      | +         |      | +       |      |  |
| Rat 4 ♂       |                                              | +    |           | +    |         | +    |                    | +    |           | +    |         | +    |                                               | +    |           | +    |         | +    |  |
| Rat 5 ♀       | +                                            |      | +         |      | +       |      | +                  |      | +         |      | +       |      | +                                             |      | +         |      | +       |      |  |
| Rat 6 ♂       |                                              | +    |           | +    |         | +    |                    | +    |           | +    |         | +    |                                               | +    |           | +    |         | +    |  |
| Rat 7 ♀       | +                                            |      | +         |      |         |      | +                  |      | +         |      | +       |      | +                                             |      | +         |      | +       |      |  |
| Rat 8 ♂       |                                              | +    |           | +    |         |      | +                  |      | +         |      | +       |      | +                                             |      | +         |      | +       |      |  |
| Rat 9 ♀       | +                                            |      | +         |      |         |      | +                  |      | +         |      | +       |      | +                                             |      | +         |      | +       |      |  |

Supplementary Table 1. Assignment of retinas for assays

<sup>a</sup>For whole mount immunocytochemistry, the entire retina from one eye was used; <sup>b</sup>For terminal deoxynucleotidyl transferase dUTP nick-end labelling (TUNEL), the nasal half of the eye was used; <sup>c</sup>For transmission electron microscopy, the temporal half of the eye was used
