# Supplementary material for: Exposure to Blue Light Reduces Melanopsin Expression in Intrinsically Photoreceptive Retinal Ganglion Cells and Damages the Inner Retina in Rats
Source: PubMed Central journal article supplement (PMC8787613; doi:10.1167/iovs.63.1.26), 2022-01-21
Supplement: iovs-63-1-26_s003.pdf [file iovs-63-1-26_s003.pdf]

**Supplementary Table 2. Counts of TUNEL- positive nuclei in the outer nuclear layer of control rats and of rats exposed to blue light**

| Section     | Acute exposure |             |             |             |             |             |             |             |             | Long term exposure |           |           |           |           |           |           |           |           | Control exposure |          |          |          |          |          |
|-------------|----------------|-------------|-------------|-------------|-------------|-------------|-------------|-------------|-------------|--------------------|-----------|-----------|-----------|-----------|-----------|-----------|-----------|-----------|------------------|----------|----------|----------|----------|----------|
|             | Animal         |             |             |             |             |             |             |             |             | Animal             |           |           |           |           |           |           |           |           | Animal           |          |          |          |          |          |
|             | 1              | 2           | 3           | 4           | 5           | 6           | 7           | 8           | 9           | 1                  | 2         | 3         | 4         | 5         | 6         | 7         | 8         | 9         | 1                | 2        | 3        | 4        | 5        | 6        |
| <b>1</b>    | 427            | 718         | 584         | 605         | 584         | 596         | 633         | 586         | 566         | 4                  | 2         | 5         | 3         | 1         | 3         | 1         | 2         | 4         | 0                | 0        | 0        | 0        | 0        | 0        |
| <b>2</b>    | 603            | 674         | 577         | 606         | 621         | 543         | 652         | 634         | 594         | 4                  | 4         | 3         | 2         | 1         | 2         | 3         | 2         | 3         | 0                | 0        | 0        | 0        | 1        | 0        |
| <b>3</b>    | 463            | 520         | 592         | 678         | 537         | 678         | 715         | 570         | 565         | 3                  | 2         | 4         | 3         | 3         | 4         | 0         | 0         | 1         | 0                | 1        | 0        | 0        | 0        | 0        |
| <b>4</b>    | 332            | 690         | 606         | 521         | 550         | 578         | 713         | 671         | 636         | 0                  | 3         | 5         | 2         | 1         | 4         | 0         | 1         | 0         | 0                | 1        | 1        | 1        | 1        | 1        |
| <b>5</b>    | 430            | 647         | 592         | 648         | 672         | 682         | 627         | 683         | 701         | 3                  | 3         | 0         | 4         | 4         | 3         | 0         | 1         | 5         | 1                | 1        | 0        | 1        | 1        | 0        |
| <b>6</b>    | 578            | 668         | 689         | 535         | 574         | 526         | 525         | 608         | 647         | 3                  | 4         | 3         | 4         | 2         | 4         | 0         | 1         | 0         | 1                | 0        | 1        | 1        | 0        | 0        |
| <b>7</b>    | 462            | 660         | 567         | 663         | 612         | 673         | 590         | 686         | 543         | 1                  | 5         | 1         | 0         | 2         | 3         | 5         | 3         | 2         | 0                | 0        | 0        | 1        | 0        | 0        |
| <b>8</b>    | 583            | 549         | 636         | 612         | 525         | 712         | 662         | 555         | 580         | 2                  | 4         | 4         | 2         | 5         | 4         | 3         | 2         | 4         | 0                | 1        | 1        | 2        | 0        | 1        |
| <b>SUM</b>  | <b>3878</b>    | <b>5126</b> | <b>4843</b> | <b>4868</b> | <b>4675</b> | <b>4988</b> | <b>5117</b> | <b>4993</b> | <b>4832</b> | <b>20</b>          | <b>27</b> | <b>25</b> | <b>20</b> | <b>19</b> | <b>27</b> | <b>12</b> | <b>12</b> | <b>19</b> | <b>2</b>         | <b>4</b> | <b>3</b> | <b>6</b> | <b>3</b> | <b>2</b> |
| <b>MEAN</b> | <b>4813.33</b> |             |             |             |             |             |             |             |             | <b>20.11</b>       |           |           |           |           |           |           |           |           | <b>3.33</b>      |          |          |          |          |          |
| <b>SD</b>   | <b>379.30</b>  |             |             |             |             |             |             |             |             | <b>5.62</b>        |           |           |           |           |           |           |           |           | <b>1.51</b>      |          |          |          |          |          |
